# Supplementary material
Source: publisher figshare collection journal article supplement (https://karger.figshare.com/ndownloader/files/25916244)
Supplement: Supplementary file 1 [file 25916244]

**Supplementary Table1.** Quality assessment of studies included.

| Author, year,  Study (Observational) | **Selection (Out of 4)** | | | | **Comparability**  **(Out of 2)** | **Outcomes(Out of 3)** | | | **Total**  **(Out of 9)** |
| --- | --- | --- | --- | --- | --- | --- | --- | --- | --- |
| Representativeness of exposed cohort | Selection of nonexposed cohort | Ascertainment  of exposure | Outcome not present at the start of the study | Assessment of outcomes | Length of follow-up | Adequacy of follow-up |
| Andersson, 2012 | 1 | 1 | 1 | 0 | 1 | 0 | 1 | 1 | 6 |
| Baek, 2013 | 1 | 1 | 1 | 1 | 1 | 0 | 1 | 1 | 7 |
| Yoon, 2015 | 1 | 1 | 1 | 1 | 2 | 1 | 1 | 1 | 9 |
| Son, 2015 | 1 | 1 | 1 | 0 | 1 | 0 | 1 | 1 | 6 |
| Singer, 2015. | 1 | 1 | 1 | 0 | 2 | 1 | 1 | 1 | 8 |
| Carneiro, 2015 | 0 | 1 | 1 | 0 | 2 | 0 | 1 | 1 | 6 |
| Gilberti, 2016 | 1 | 1 | 1 | 0 | 2 | 0 | 1 | 1 | 7 |
| Werner, 2016 | 1 | 0 | 1 | 1 | 2 | 0 | 1 | 1 | 7 |
| Mokin, 2016 | 1 | 1 | 1 | 0 | 2 | 1 | 1 | 1 | 8 |
| Du, 2016 | 1 | 1 | 1 | 0 | 1 | 0 | 1 | 1 | 6 |
| Bouslama, 2017 | 1 | 1 | 1 | 0 | 2 | 1 | 1 | 1 | 8 |
| Uno, 2017 | 1 | 1 | 1 | 0 | 1 | 1 | 1 | 1 | 7 |
| Luo, 2017 | 1 | 1 | 1 | 1 | 1 | 1 | 1 | 1 | 8 |
| Hu, 2017 | 1 | 1 | 1 | 0 | 1 | 0 | 1 | 1 | 6 |
| Raymond, 2017 | 1 | 1 | 1 | 0 | 1 | 0 | 1 | 1 | 6 |
| Lee, 2018 | 1 | 1 | 1 | 0 | 2 | 1 | 1 | 1 | 8 |
| Yang, 2018 | 1 | 1 | 1 | 0 | 2 | 0 | 1 | 1 | 7 |
| Rentzos, 2018 | 1 | 1 | 1 | 0 | 2 | 1 | 1 | 1 | 8 |
| Kang, 2018 | 1 | 1 | 1 | 1 | 2 | 1 | 1 | 1 | 9 |
| Zhang, 2018 | 1 | 1 | 1 | 1 | 2 | 1 | 1 | 1 | 9 |
| Giorgianni, 2018 | 1 | 1 | 1 | 0 | 2 | 1 | 1 | 1 | 8 |
| Tran, 2019 | 1 | 0 | 1 | 0 | 2 | 0 | 1 | 1 | 6 |
| Chen, 2019 | 1 | 1 | 1 | 1 | 2 | 1 | 1 | 1 | 9 |
| Quan, 2019 | 1 | 1 | 1 | 1 | 1 | 0 | 1 | 1 | 7 |
| Kim, 2019 | 1 | 1 | 1 | 0 | 2 | 1 | 1 | 1 | 8 |
| Jurado, 2019 | 1 | 1 | 1 | 0 | 1 | 0 | 1 | 1 | 6 |
| Lee, 2020 | 1 | 1 | 1 | 1 | 2 | 1 | 1 | 1 | 9 |
| Dornak, 2015 | 1 | 0 | 1 | 1 | 2 | 1 | 1 | 1 | 8 |
| Li, 2018 | 1 | 1 | 1 | 1 | 1 | 0 | 1 | 1 | 7 |
| Dias, 2019 | 0 | 1 | 1 | 1 | 1 | 0 | 1 | 1 | 6 |
| Alemseged, 2019 | 1 | 1 | 1 | 0 | 2 | 1 | 1 | 1 | 8 |
| Gramegna, 2019 | 1 | 1 | 1 | 0 | 1 | 2 | 1 | 1 | 8 |
| Sang, 2019 | 1 | 1 | 1 | 1 | 2 | 1 | 1 | 1 | 9 |

Observational studies were assessed by the Newcastle-Ottawa Quality Assessment Scale.
